# Supplementary material for: Conversion of bio-carbohydrates to 5-hydroxymethylfurfural in three-component deep eutectic solvent
Source: PubMed Central journal article supplement — RSC Adv. 2022 May 18;12(23):14957–63. doi: 10.1039/d2ra01688e (PMC9115872; doi:10.1039/d2ra01688e), 2022-05-18
Supplement: RA-012-D2RA01688E-s001.pdf [file RA-012-D2RA01688E-s001.pdf]

## Conversion of Bio-carbohydrates to 5-Hydroxymethylfurfural in the Three-component Deep Eutectic Solvent

Hongtao Zhang,<sup>a</sup> Xiao Liu,<sup>\*b</sup> Miaomiao Han,<sup>\*b</sup> and Rui Zhang<sup>\*a</sup>

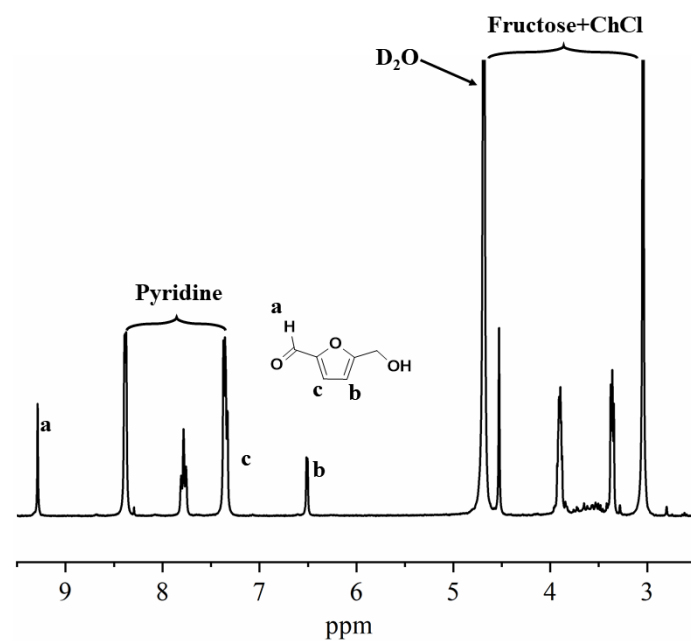

(a)

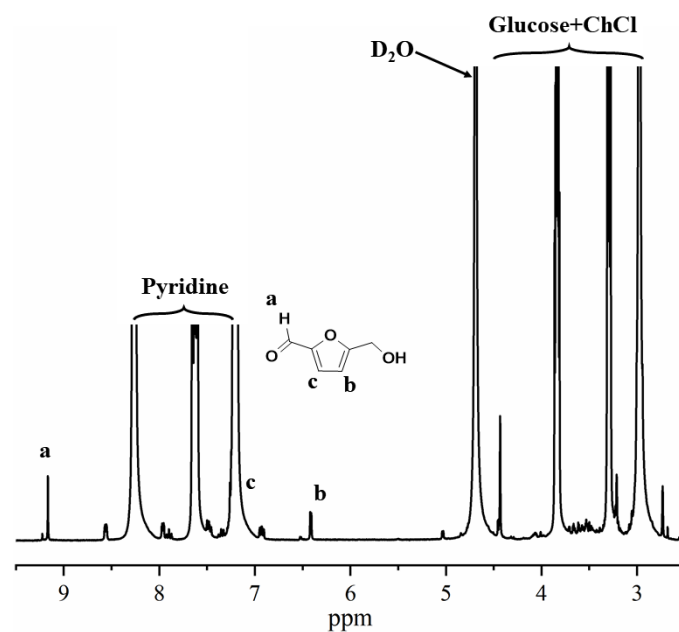

(b)

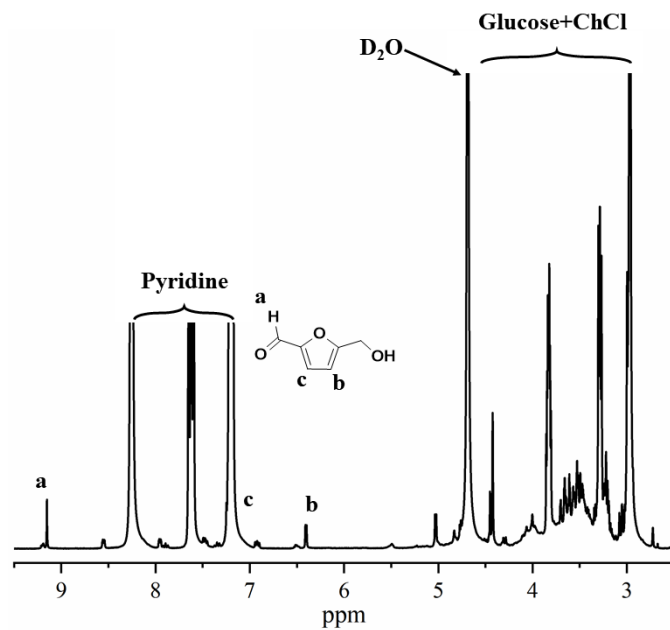

(c)

Figure S1.  $^1\text{H}$  NMR spectra obtained with different reaction conditions. (a) fructose content: 50 wt%, 120 °C, 1h; (b) glucose content: 30 wt%, 100 °C, 1h; (c) glucose content: 60 wt%, 100 h, 1 h. Preliminary DESs used for all reactions: ChCl/boric acid: 1/1(mol/mol)
